# Supplementary material
Source: publisher figshare collection journal article supplement (https://acs.figshare.com/ndownloader/files/3685845)
Supplement: Supplementary file 1 [file 3685845]

# Attractive forces between hydrophobic solid surfaces measured by AFM on the first approach in salt solutions and in the presence of dissolved gas

Mehdi Azadi<sup>1</sup>, Anh V. Nguyen<sup>1\*</sup> and Gleb Yakubov<sup>1,2</sup>

<sup>1</sup> School of Chemical Engineering, The University of Queensland, Brisbane, Queensland 4072, Australia

<sup>2</sup> ARC Centre of Excellence in Plant Cell Walls, The University of Queensland, Brisbane, Queensland 4072, Australia

## Supplementary Information

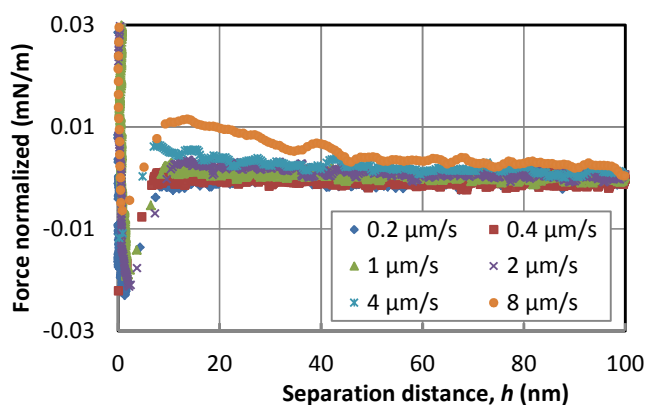

**Figure S1.** Force-distance profiles between hydrophobic surfaces measured at different driving speeds. The curves were measured using  $R=10\ \mu\text{m}$  colloidal probe and rectangular cantilever with  $0.2\ \text{N/m}$  spring constant.
